# Supplementary material for: Improving Education and Training of Dutch Major Hazard Control Inspectors: A 15 Years Longitudinal Case Study
Source: MDPI journal article supplement (doi:10.3390/ijerph17061959), 2020-03-17
Supplement: s1 [file s1]

# Datafile 4 - External and internal triggers for change of the MHC ETP

| Nr | ETP Subject matter                       | Change 2003 –                                                       | 2008 –                                                                                                                                                                                                                                                                                                                                                                                                                                                                       | 2014 –                                                                                                                                                                                      | 2018                                           |
|----|------------------------------------------|---------------------------------------------------------------------|------------------------------------------------------------------------------------------------------------------------------------------------------------------------------------------------------------------------------------------------------------------------------------------------------------------------------------------------------------------------------------------------------------------------------------------------------------------------------|---------------------------------------------------------------------------------------------------------------------------------------------------------------------------------------------|------------------------------------------------|
| 1  | Job Requirements                         | [HBO/Acad]<br>[HVK/Moshe]                                           | [Same]                                                                                                                                                                                                                                                                                                                                                                                                                                                                       | 2018 Swuste&Sillem Moshe evaluation                                                                                                                                                         |                                                |
| 2  | General legislation                      |                                                                     | PED, ATEX<br>AWB WAHHS                                                                                                                                                                                                                                                                                                                                                                                                                                                       |                                                                                                                                                                                             |                                                |
| 3  | Special Legislation                      | BRZO'99                                                             | [ - - - - - ARIE - - - - - ]                                                                                                                                                                                                                                                                                                                                                                                                                                                 | BRZO2015, RRZO2016                                                                                                                                                                          |                                                |
| 4  | Cooperation                              |                                                                     | LAT GIR RUD                                                                                                                                                                                                                                                                                                                                                                                                                                                                  | BRZO+                                                                                                                                                                                       |                                                |
| 5  | How companies work                       | [same]                                                              |                                                                                                                                                                                                                                                                                                                                                                                                                                                                              |                                                                                                                                                                                             |                                                |
| 6  | Safety Management System                 | BRZO'99<br>Elements #1-7                                            | ISO 31000:2009<br>Elements #a-h                                                                                                                                                                                                                                                                                                                                                                                                                                              | Seveso III,2012<br>Elements #i-vii                                                                                                                                                          |                                                |
| 7  | Process installations                    | MOOIS Maintenance                                                   | Bio-technology<br>Software Architecture                                                                                                                                                                                                                                                                                                                                                                                                                                      | KPI<br>Ageing                                                                                                                                                                               |                                                |
| 8  | Dangerous chemicals                      |                                                                     | Fuels quantity<br>GHS REACH CLP                                                                                                                                                                                                                                                                                                                                                                                                                                              |                                                                                                                                                                                             |                                                |
| 9  | Learning from accidents                  | [same]                                                              | [new accidents]                                                                                                                                                                                                                                                                                                                                                                                                                                                              |                                                                                                                                                                                             |                                                |
| 10 | Learning from practice                   | EC joint visits                                                     |                                                                                                                                                                                                                                                                                                                                                                                                                                                                              | BES islands                                                                                                                                                                                 |                                                |
| 11 | Coaching                                 | [Duo]                                                               | [Accounts]                                                                                                                                                                                                                                                                                                                                                                                                                                                                   | [Peer support]                                                                                                                                                                              |                                                |
| 12 | Safety Inspection Approach               | AVRIM2                                                              | NIVRIM                                                                                                                                                                                                                                                                                                                                                                                                                                                                       | NIM                                                                                                                                                                                         | NIM2 [LBR]                                     |
| 13 | Reporting System                         | Bundled set                                                         | Joint GIR report                                                                                                                                                                                                                                                                                                                                                                                                                                                             |                                                                                                                                                                                             |                                                |
| 14 | Appraisal/Ranking                        |                                                                     | GIR ranking                                                                                                                                                                                                                                                                                                                                                                                                                                                                  | MHC Team reviews                                                                                                                                                                            |                                                |
| 15 | Public Information                       |                                                                     |                                                                                                                                                                                                                                                                                                                                                                                                                                                                              | Joint public summary                                                                                                                                                                        |                                                |
| 16 | Negotiations                             | CPR-20 /RIB                                                         | NTA-8620,                                                                                                                                                                                                                                                                                                                                                                                                                                                                    | PGS-6/-15                                                                                                                                                                                   |                                                |
| 17 | Law Enforcement                          | Small fines / Criminal law                                          |                                                                                                                                                                                                                                                                                                                                                                                                                                                                              | Large fines / Administrative law                                                                                                                                                            |                                                |
| 18 | Create Safety Knowledge                  | MHC Annual report                                                   | LFA meetings                                                                                                                                                                                                                                                                                                                                                                                                                                                                 | Storybuilder                                                                                                                                                                                | Theses, Publications                           |
| 19 | Regulator organisation                   | Regional teams                                                      | Directorate                                                                                                                                                                                                                                                                                                                                                                                                                                                                  |                                                                                                                                                                                             | Programme structure                            |
| 21 | Professional standards                   | Uniform inspections<br>Use SMS appraisal guidelines<br>Auditor role | Establish joint ICT/knowledge platform<br>System vs Measures inspections/5 year cycle<br>Risk based inspection<br>Cooperation between inspection partners<br>NIM inspection leader<br>Stronger law enforcement tools<br>Inspection must continue                                                                                                                                                                                                                             | ISO-19011, 2018                                                                                                                                                                             |                                                |
| 22 | ETP Change process                       | [same]                                                              | [same]                                                                                                                                                                                                                                                                                                                                                                                                                                                                       | Less theory - more practice<br>Less company input – more SZW input<br>Restructured around SMS<br>Updated accident cases                                                                     |                                                |
| 23 | Evaluation practice internal<br>external | 2003 Execution performance<br>BTO,2007<br>KPMG,2003                 | 2008 Hulst-Ouwerkerk-<br>2018 Wingerde et al-Administrative law enforcement burden<br>2012 Ale&Mertens<br>2013 Lieshout<br>2013 contents evaluation                                                                                                                                                                                                                                                                                                                          | 2014 Execution performance<br>Criminal law enforcement weakness<br>2017 contents/teaching style evaluation<br>2015 Veld<br>2017 Ale et al<br>2017 Swuste& Reniers                           | 2018 Execution performance<br>2018 Pronk et al |
| 24 | Educational objectives                   |                                                                     | Less theory<br>Focus on risk assessment<br>Non standard conditions<br>Poor design and supervision<br>Use 'what went wrong'<br>Less statistical theory<br>Include kpi, ageing, plant layout and software archit<br>Include culture, procedures and language issues<br>Companies to continuously assess risks<br>Less company input<br>Elaborate on risk management<br>Requirements & compliance<br>Learn from practice<br>Elaborate on process safety<br>Elaborate on toolbox |                                                                                                                                                                                             |                                                |
| 25 | Quality of education                     | Adopt auditor style                                                 | Reduce intro part<br>Plan earlier after hiring<br>More interactive<br>Change teaching style and e-learning<br>Use info from inspection practice<br>Introduce examination                                                                                                                                                                                                                                                                                                     | Structure along SMS elements<br>Joint inspection partner training<br>More interactive<br>Change teaching style and e-learning<br>Use info from inspection practice<br>Introduce examination |                                                |
