# Supplementary material for: Improving Education and Training of Dutch Major Hazard Control Inspectors: A 15 Years Longitudinal Case Study
Source: MDPI journal article supplement (doi:10.3390/ijerph17061959), 2020-03-17
Supplement: s1 [file s1]

| Rating | Weeks |
|--------|-------|
| 1      | 5     |

| SUMMARY OF HOURS PER ETC BLUE PRINT 18 |                  |                                                                                 |      |
|----------------------------------------|------------------|---------------------------------------------------------------------------------|------|
| No                                     | Aspect           | Hours spent on education and training per year (not an aspect per time section) | 2000 |
| ETP Subject matter                     |                  |                                                                                 |      |
| 1                                      | 1.1. Management  | 10                                                                              | 10   |
| 2                                      | 1.2. Management  | 10                                                                              | 10   |
| 3                                      | 1.3. Management  | 10                                                                              | 10   |
| 4                                      | 1.4. Management  | 10                                                                              | 10   |
| 5                                      | 1.5. Management  | 10                                                                              | 10   |
| 6                                      | 1.6. Management  | 10                                                                              | 10   |
| 7                                      | 1.7. Management  | 10                                                                              | 10   |
| 8                                      | 1.8. Management  | 10                                                                              | 10   |
| 9                                      | 1.9. Management  | 10                                                                              | 10   |
| 10                                     | 1.10. Management | 10                                                                              | 10   |
| 11                                     | 1.11. Management | 10                                                                              | 10   |
| 12                                     | 1.12. Management | 10                                                                              | 10   |
| 13                                     | 1.13. Management | 10                                                                              | 10   |
| 14                                     | 1.14. Management | 10                                                                              | 10   |
| 15                                     | 1.15. Management | 10                                                                              | 10   |
| 16                                     | 1.16. Management | 10                                                                              | 10   |
| 17                                     | 1.17. Management | 10                                                                              | 10   |
| 18                                     | 1.18. Management | 10                                                                              | 10   |
| 19                                     | 1.19. Management | 10                                                                              | 10   |
| 20                                     | 1.20. Management | 10                                                                              | 10   |
| 21                                     | 1.21. Management | 10                                                                              | 10   |
| 22                                     | 1.22. Management | 10                                                                              | 10   |
| 23                                     | 1.23. Management | 10                                                                              | 10   |
| 24                                     | 1.24. Management | 10                                                                              | 10   |
| 25                                     | 1.25. Management | 10                                                                              | 10   |
| 26                                     | 1.26. Management | 10                                                                              | 10   |
| 27                                     | 1.27. Management | 10                                                                              | 10   |
| 28                                     | 1.28. Management | 10                                                                              | 10   |
| 29                                     | 1.29. Management | 10                                                                              | 10   |
| 30                                     | 1.30. Management | 10                                                                              | 10   |
| 31                                     | 1.31. Management | 10                                                                              | 10   |
| 32                                     | 1.32. Management | 10                                                                              | 10   |
| 33                                     | 1.33. Management | 10                                                                              | 10   |
| 34                                     | 1.34. Management | 10                                                                              | 10   |
| 35                                     | 1.35. Management | 10                                                                              | 10   |
| 36                                     | 1.36. Management | 10                                                                              | 10   |
| 37                                     | 1.37. Management | 10                                                                              | 10   |
| 38                                     | 1.38. Management | 10                                                                              | 10   |
| 39                                     | 1.39. Management | 10                                                                              | 10   |
| 40                                     | 1.40. Management | 10                                                                              | 10   |
| 41                                     | 1.41. Management | 10                                                                              | 10   |
| 42                                     | 1.42. Management | 10                                                                              | 10   |
| 43                                     | 1.43. Management | 10                                                                              | 10   |
| 44                                     | 1.44. Management | 10                                                                              | 10   |
| 45                                     | 1.45. Management | 10                                                                              | 10   |
| 46                                     | 1.46. Management | 10                                                                              | 10   |
| 47                                     | 1.47. Management | 10                                                                              | 10   |
| 48                                     | 1.48. Management | 10                                                                              | 10   |
| 49                                     | 1.49. Management | 10                                                                              | 10   |
| 50                                     | 1.50. Management | 10                                                                              | 10   |
| 51                                     | 1.51. Management | 10                                                                              | 10   |
| 52                                     | 1.52. Management | 10                                                                              | 10   |
| 53                                     | 1.53. Management | 10                                                                              | 10   |
| 54                                     | 1.54. Management | 10                                                                              | 10   |
| 55                                     | 1.55. Management | 10                                                                              | 10   |
| 56                                     | 1.56. Management | 10                                                                              | 10   |
| 57                                     | 1.57. Management | 10                                                                              | 10   |
| 58                                     | 1.58. Management | 10                                                                              | 10   |
| 59                                     | 1.59. Management | 10                                                                              | 10   |
| 60                                     | 1.60. Management | 10                                                                              | 10   |
| 61                                     | 1.61. Management | 10                                                                              | 10   |
| 62                                     | 1.62. Management | 10                                                                              | 10   |
| 63                                     | 1.63. Management | 10                                                                              | 10   |
| 64                                     | 1.64. Management | 10                                                                              | 10   |
| 65                                     | 1.65. Management | 10                                                                              | 10   |
| 66                                     | 1.66. Management | 10                                                                              | 10   |
| 67                                     | 1.67. Management | 10                                                                              | 10   |
| 68                                     | 1.68. Management | 10                                                                              | 10   |
| 69                                     | 1.69. Management | 10                                                                              | 10   |
| 70                                     | 1.70. Management | 10                                                                              | 10   |
| 71                                     | 1.71. Management | 10                                                                              | 10   |
| 72                                     | 1.72. Management | 10                                                                              | 10   |
| 73                                     | 1.73. Management | 10                                                                              | 10   |
| 74                                     | 1.74. Management | 10                                                                              | 10   |
| 75                                     | 1.75. Management | 10                                                                              | 10   |
| 76                                     | 1.76. Management | 10                                                                              | 10   |
| 77                                     | 1.77. Management | 10                                                                              | 10   |
| 78                                     | 1.78. Management | 10                                                                              | 10   |
| 79                                     | 1.79. Management | 10                                                                              | 10   |
| 80                                     | 1.80. Management | 10                                                                              | 10   |
| 81                                     | 1.81. Management | 10                                                                              | 10   |
| 82                                     | 1.82. Management | 10                                                                              | 10   |
| 83                                     | 1.83. Management | 10                                                                              | 10   |
| 84                                     | 1.84. Management | 10                                                                              | 10   |
| 85                                     | 1.85. Management | 10                                                                              | 10   |
| 86                                     | 1.86. Management | 10                                                                              | 10   |
| 87                                     | 1.87. Management | 10                                                                              | 10   |
| 88                                     | 1.88. Management | 10                                                                              | 10   |
| 89                                     | 1.89. Management | 10                                                                              | 10   |
| 90                                     | 1.90. Management | 10                                                                              | 10   |
| 91                                     | 1.91. Management | 10                                                                              | 10   |
| 92                                     | 1.92. Management | 10                                                                              | 10   |
| 93                                     | 1.93. Management | 10                                                                              | 10   |

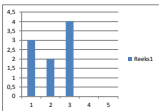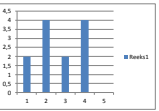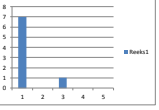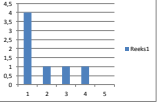

|   | 1 | 2 | 3 | 4 | 5 |
|---|---|---|---|---|---|
| 1 |   |   |   |   |   |
| 2 |   |   |   |   |   |
| 3 |   |   |   |   |   |
| 4 |   |   |   |   |   |
| 5 |   |   |   |   |   |

| Rating | Weeks |
|--------|-------|
| 1      | 38    |
| 2      | 1     |
| 3      | 18    |
| 4      | 1     |
| 5      | 0     |

| Category | Reads1 |
|----------|--------|
| 1        | 29     |
| 2        | 3      |
| 3        | 4      |
| 4        | 11     |

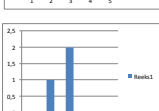

| Rank | Number of Ranks |
|------|-----------------|
| 1    | 14              |
| 2    | 2               |
| 3    | 0               |
| 4    | 0               |
| 5    | 0               |
| 6    | 0               |
| 7    | 0               |
| 8    | 0               |
| 9    | 0               |
| 10   | 0               |

---

| Rating | Weeks1 |
|--------|--------|
| 1      | 8      |
| 2      | 0      |
| 3      | 1      |
| 4      | 0      |
| 5      | 0      |
